# Supplementary material for: Influence of Hydrogenation on Morphology, Chemical Structure and Photocatalytic Efficiency of Graphitic Carbon Nitride
Source: MDPI journal article supplement (doi:10.3390/ijms222313096), 2021-12-03
Supplement: s1 [file s1]

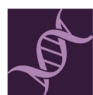

Supplementary Materials

# Influence of hydrogenation on morphology, chemical structure and photocatalytic efficiency of graphitic carbon nitride

Daria Baranowska \*, Tomasz Kędzierski, Małgorzata Aleksandrak, Ewa Mijowska and Beata Zielińska \*

Department of Nanomaterials Physicochemistry, Faculty of Chemical Technology and Engineering, West Pomeranian University of Technology, Szczecin, Piastow Ave. 42, 71-065 Szczecin, Poland; tomasz.kedzierski@zut.edu.pl (T.K.); malgorzata.wojtonisak@zut.edu.pl (M.A.); ewa.borowiak-palen@zut.edu.pl (E.M.)

\* Correspondence: bd36293@zut.edu.pl (D.B.); bzielinska@zut.edu.pl (B.Z.)

**Citation:** Baranowska, D.; Kędzierski, T.; Aleksandrak, M.; Mijowska, E.; Zielińska, B. Influence of Hydrogenation on Morphology, Chemical Structure and Photocatalytic Efficiency of Graphitic Carbon Nitride. *Int. J. Mol. Sci.* **2021**, *22*, 13096. <https://doi.org/10.3390/ijms222313096>

Academic Editor: Valentina Villari

Received: 8 November 2021

Accepted: 1 December 2021

Published: 3 December 2021

**Publisher's Note:** MDPI stays neutral with regard to jurisdictional claims in published maps and institutional affiliations.

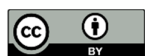

**Copyright:** © 2021 by the authors. Licensee MDPI, Basel, Switzerland. This article is an open access article distributed under the terms and conditions of the Creative Commons Attribution (CC BY) license (<https://creativecommons.org/licenses/by/4.0/>).

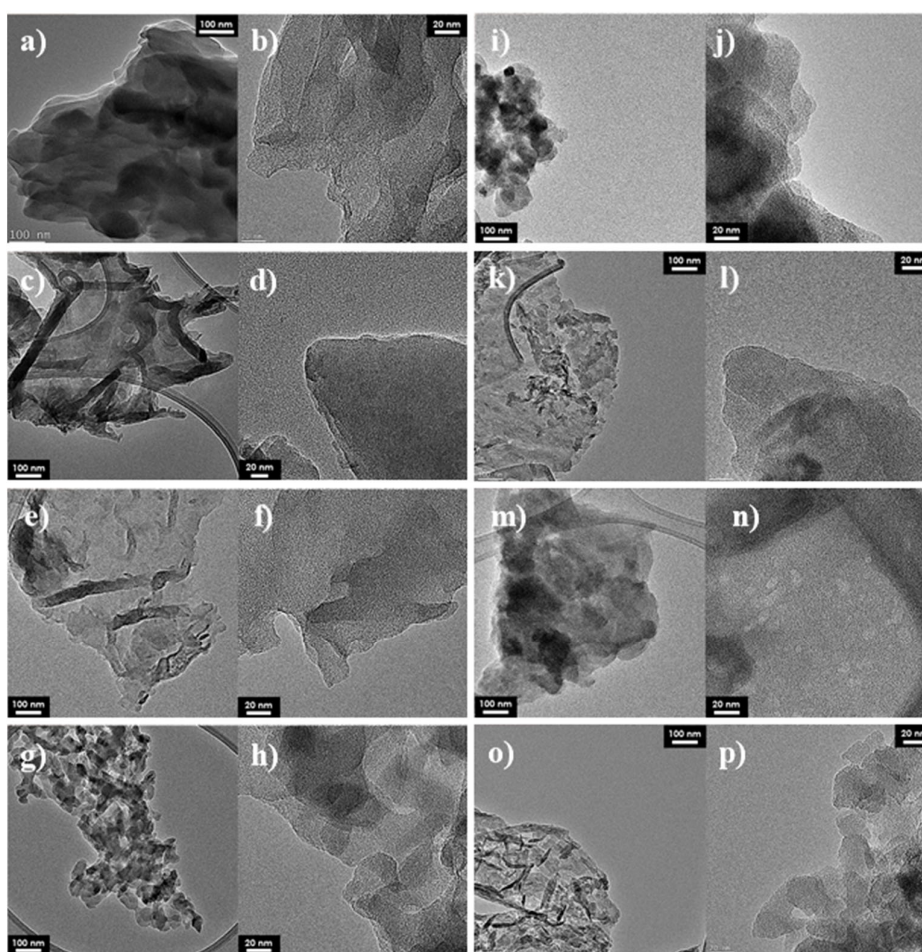

**Figure S1.** TEM images of gCN (a,b), 400-2 (c,d), 450-2 (e,f), 550-2 (g,h), 500-1 (i,j), 500-2 (k,l), 500-3 (m,n), and 500-4 (o,p).

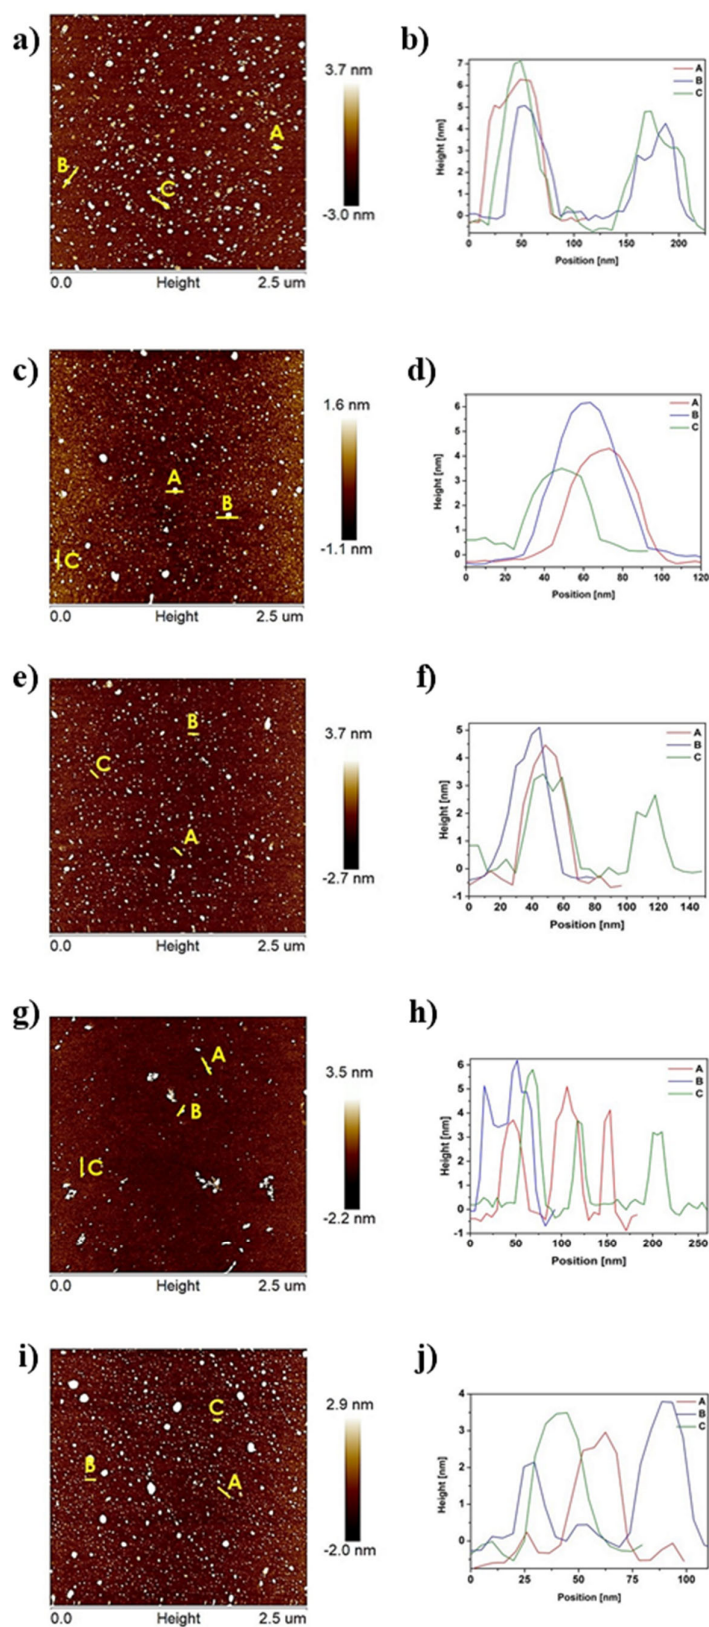

**Figure S2.** AFM images and height profiles of 400-2 (a,b), 450-2 (c,d), 500-1 (e,f), 500-3 (g,h), and 550-2 (i,j).

**Table S1.** AFM data of gCN prepared under different conditions.

| Sample | Thickness [nm] | Mean thickness [nm] | Lateral size [ $\mu\text{m}$ ] | Mean size [ $\mu\text{m}$ ] | Number of layers |
|--------|----------------|---------------------|--------------------------------|-----------------------------|------------------|
| gCN    | 4 – 9          | 6.46                | 0.067 – 0.136                  | 0.104                       | 12 – 28          |
| 400-2  | 4 – 8          | 5.82                | 0.062 – 0.088                  | 0.074                       | 12 – 25          |
| 450-2  | 3 – 6          | 4.34                | 0.061 – 0.099                  | 0.073                       | 9 – 18           |
| 500-1  | 2 – 7          | 4.26                | 0.044 – 0.074                  | 0.055                       | 6 – 21           |
| 500-2  | 1 – 5          | 2.59                | 0.031 – 0.133                  | 0.092                       | 3 – 15           |
| 500-3  | 1 – 5          | 2.24                | 0.028 – 0.077                  | 0.049                       | 3 – 15           |
| 500-4  | 1 – 5          | 2.28                | 0.036 – 0.098                  | 0.075                       | 3 – 15           |
| 550-2  | 2 – 6          | 4.55                | 0.044 – 0.098                  | 0.058                       | 6 – 22           |

**Table S2.** Carbon (C), nitrogen (N), oxygen (O) atomic concentration in gCN and 500-4.

| Sample | C (at%) | N (at%) | O (at%) |
|--------|---------|---------|---------|
| gCN    | 37.09   | 62.46   | 0.45    |
| 500-4  | 35.16   | 64.73   | 0.12    |

**Table S3.** Chemical composition of gCN and 500-4 calculated from the peak-fitting procedure applied to the C 1s and N 1s spectra of the samples.

| Sample | N – C = N (at%) | C – NH <sub>x</sub> (at%) | C – C/C = C (at%) | N <sub>2</sub> C (at%) | N – H <sub>x</sub> (at%) | N <sub>3</sub> C (at%) |
|--------|-----------------|---------------------------|-------------------|------------------------|--------------------------|------------------------|
| gCN    | 79.70           | 8.40                      | 11.9              | 81.02                  | 4.04                     | 14.94                  |
| 500-4  | 72.75           | 21.66                     | 5.60              | 88.41                  | 9.22                     | 2.37                   |

**Table S4.** Kinetic parameters of photocatalytic RhB decomposition.

| Sample | k [1/min] | R <sup>2</sup> |
|--------|-----------|----------------|
| gCN    | 0.27314   | 0.98761        |
| 400-2  | 0.47160   | 0.99391        |
| 450-2  | 0.46404   | 0.99498        |
| 500-1  | 0.46198   | 0.98105        |
| 500-2  | 0.80280   | 0.98976        |
| 500-3  | 0.79782   | 0.99592        |
| 500-4  | 1.11803   | 0.99253        |
| 550-2  | 0.69168   | 0.99351        |

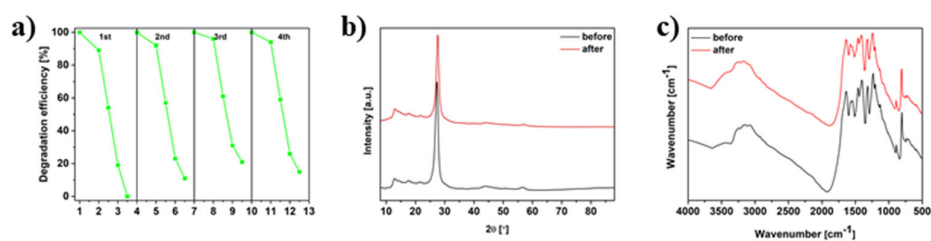

**Figure S3.** 500-4 photocatalyst stability (a). The XRD patterns (b) and FTIR spectra (c) before (black line) and after (red line) four photocatalytic cycles of RhB decomposition catalyzed by 500-4 sample.

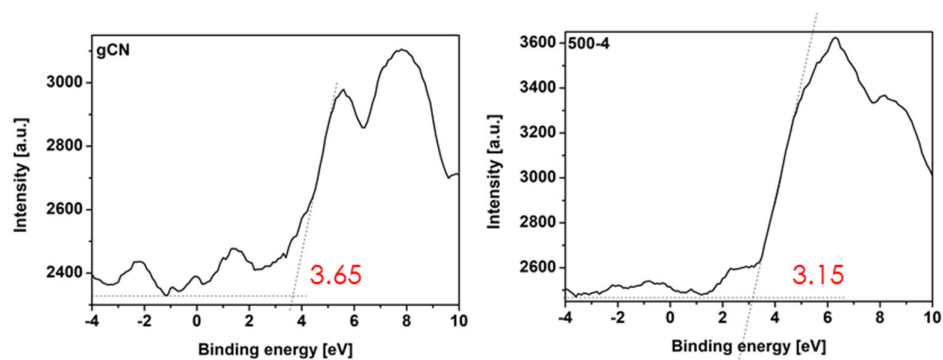

**Figure S4.** XPS valence band spectra of the gCN and 500-4 sample.
